# Supplementary material for: The role of hybrid dielectric interfaces in improving the performance of multilayer InSe transistors
Source: Royal Society of Chemistry journal article supplement (doi:10.1039/d0tc00331j), 2020-01-01
Supplement: d0tc00331j1.pdf [file d0tc00331j1.pdf]

## Supporting Information

### The Role of Hybrid Dielectric Interface in Improving the Performance of Multilayer InSe Transistors

*Shichao Zhang<sup>†,§</sup>, Yunfeng Qiu<sup>†,§</sup>, Huihui Yang<sup>‡</sup>, Dao Wang<sup>l</sup>, Yunxia Hu<sup>‡</sup>, Xubing Lu<sup>l</sup>,  
Zhonghua Li<sup>\*†,§</sup>, and PingAn Hu<sup>\*†,‡,§</sup>*

<sup>†</sup>School of Chemistry and Chemical Engineering, Harbin Institute of Technology,  
Harbin, 150001, P. R. China

<sup>‡</sup>School of Materials Science and Engineering, Harbin Institute of Technology, Harbin  
150001, P. R. China

<sup>§</sup>Key Laboratory of Micro-systems and Micro-structures Manufacturing of Ministry of  
Education, Harbin Institute of Technology, Harbin 150080, P. R. China

<sup>l</sup>Institute for Advanced Materials, South China Academy of Advanced Optoelectronics,  
South China Normal University, Guangzhou, 51000, P. R. China

E-mail: [hupa@hit.edu.cn](mailto:hupa@hit.edu.cn), [lizh@hit.edu.cn](mailto:lizh@hit.edu.cn)

KEYWORDS:  $\beta$ -InSe, Coulomb scattering, surface optical phonon scattering,  
interfacial traps, hybrid dielectric

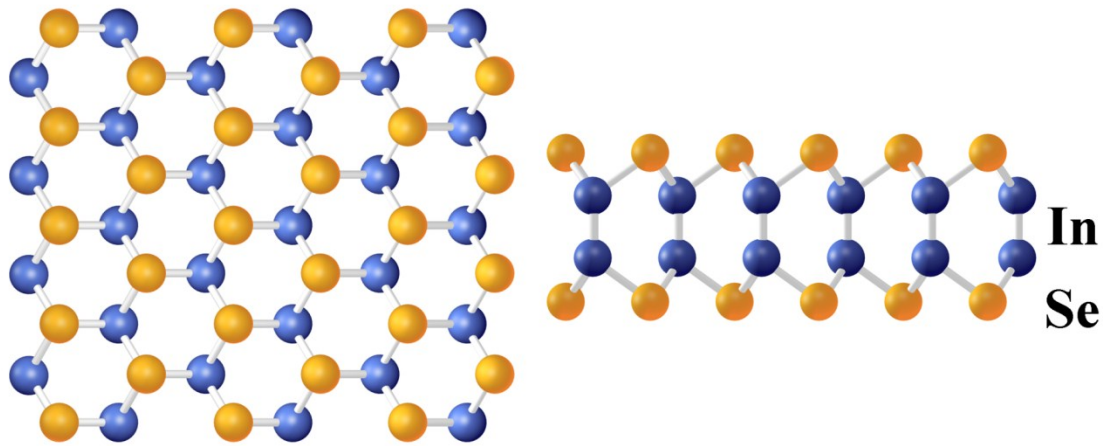

**Figure S1.** Schematic of  $\beta$ -InSe crystal structure. Left panel shows a top view of the InSe crystal structure and right panel displays a side view

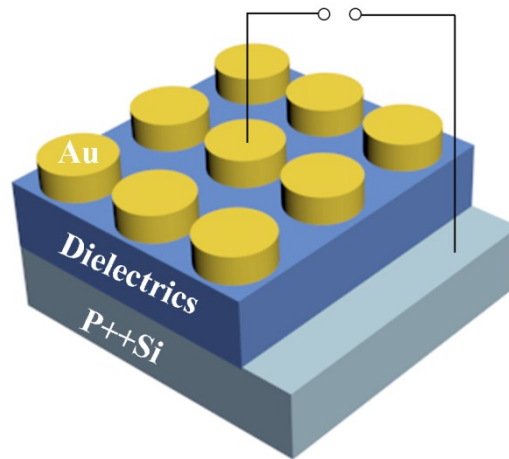

**Figure S2.** Schematic diagram of a MIM capacitor

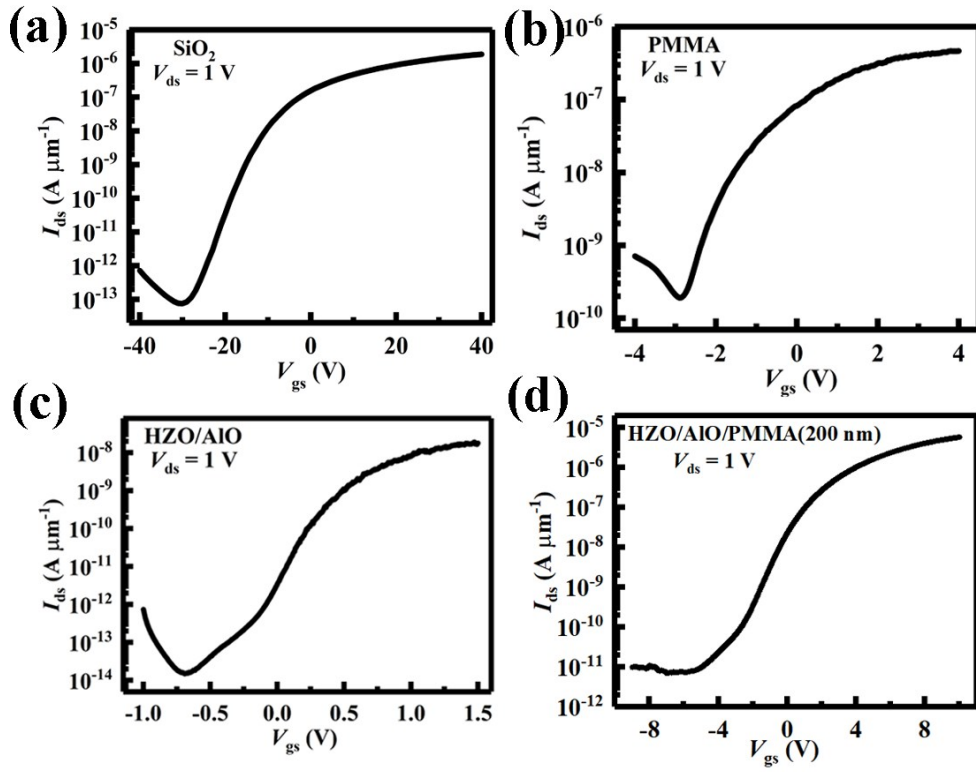

**Figure S3.** Typical transfer characteristics of InSe transistors using various gate dielectric layers using (a) SiO<sub>2</sub> (300 nm), the channel length and width are 27 μm and 24 μm, respectively, (b) PMMA (200 nm), the channel length and width are 28 μm and 26 μm, respectively, (c) HZO (20 nm)/AlO (4 nm), the channel length and width are 30 μm and 25 μm, respectively, (d) HZO (20 nm)/AlO (4 nm)/PMMA (200 nm) hybrid dielectric device, the channel length and width are 28 μm and 24 μm, respectively.

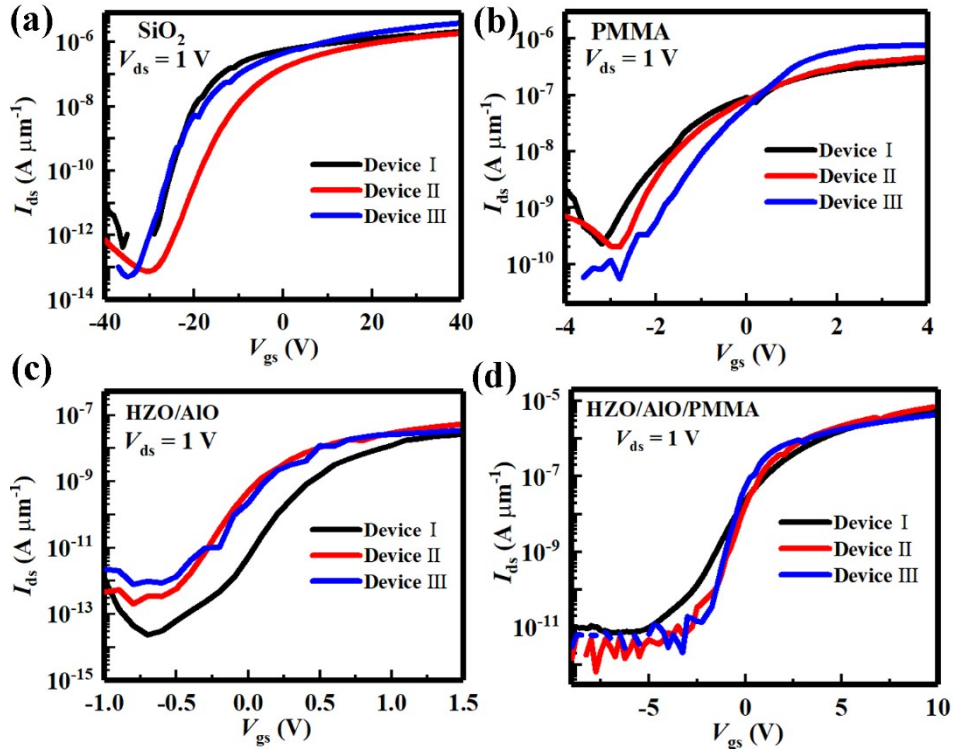

**Figure S4.** Transfer characteristics of multiple InSe transistors using various gate dielectric layers

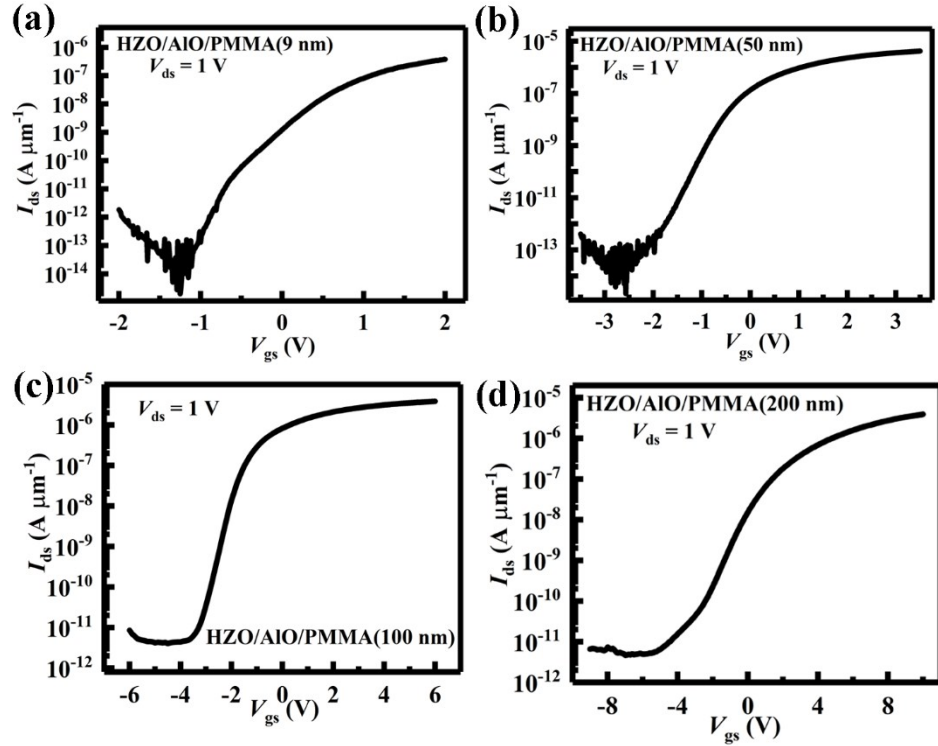

**Figure S5.** Transfer characteristics of InSe transistors using HZO (20 nm)/AIO (4 nm)/PMMA (9 ~ 200 nm) trilayer device

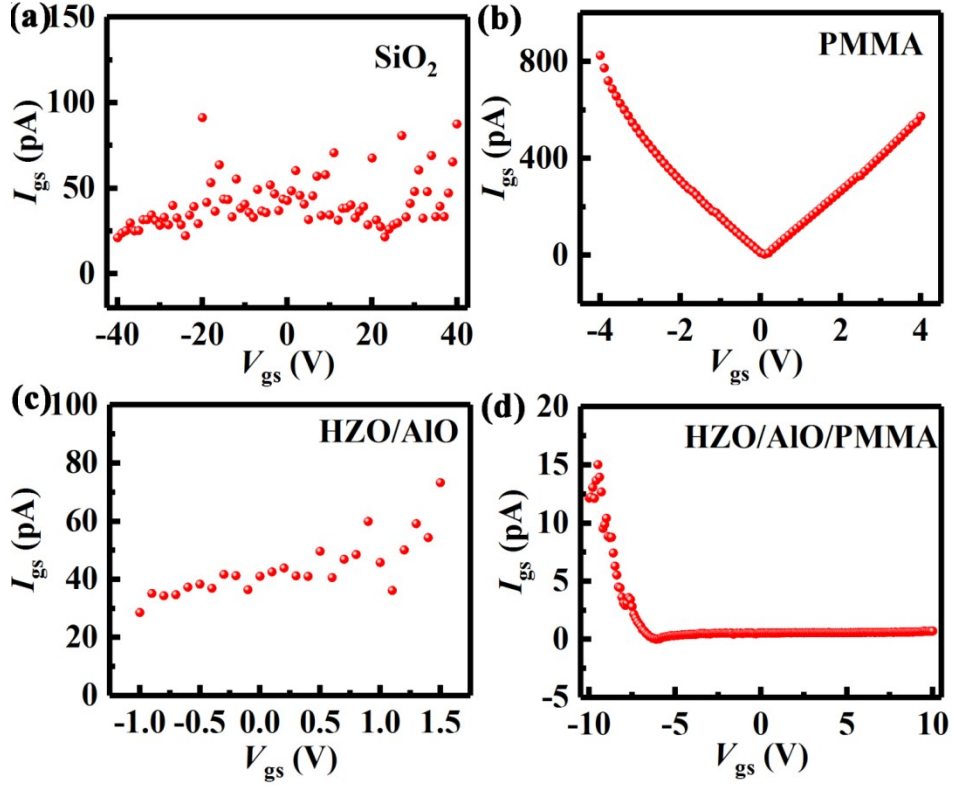

**Figure S6.**  $I_{gs}$  versus  $V_{gs}$  of InSe transistors using various gate dielectric layers

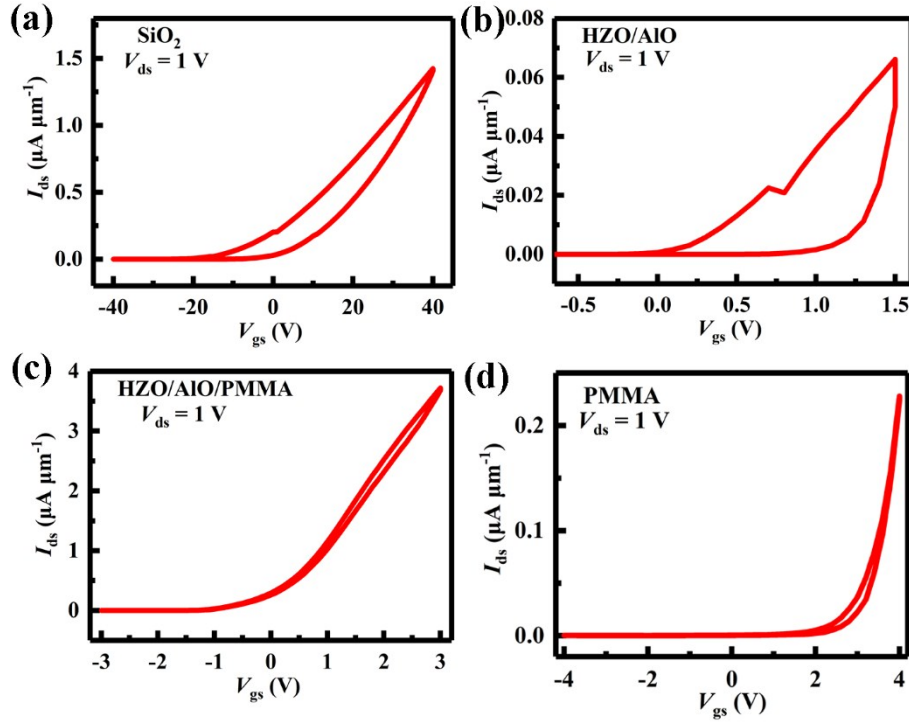

**Figure S7.** Transfer characteristics of InSe transistors using various gate dielectric layers with forward and backward scans of the gate voltage.

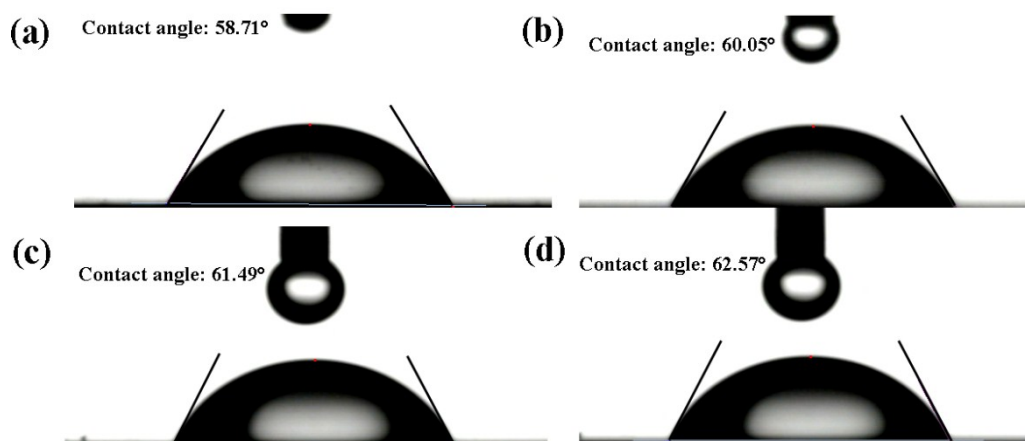

**Figure S8.** Images of water drops on hybrid dielectric layers for contact angle measurement: (a) HZO/AlO<sub>3</sub>/PMMA (20 nm/4 nm/9 nm), (b) HZO/AlO<sub>3</sub>/PMMA (20 nm/4 nm/50 nm), (c) HZO/AlO<sub>3</sub>/PMMA (20 nm/4 nm/100 nm), (d) HZO/AlO<sub>3</sub>/PMMA (20 nm/4 nm/200 nm).
